# Supplementary material
Source: PubMed Central journal article supplement (PMC3302158)
Supplement: NIHMS359174-supplement-supplementary_data.pdf [file NIHMS359174-supplement-supplementary_data.pdf]

Table 1: Tumor absorbed dose measures and response for all imaged tumors.

| Subject       | Tumor name          | Average Dose (cGy) | EUD (cGy)  | Max. Dose (cGy) | D99 <sup>†</sup> (cGy) | D80 (cGy)  | Initial Vol. (mL) | Volume decrease during tracer SPECT/CT <sup>*</sup> % | Volume decrease during therapy SPECT/CT <sup>**</sup> % | Decrease in product of diameters at 2 months <sup>***</sup> % | Overall response <sup>****</sup> |
|---------------|---------------------|--------------------|------------|-----------------|------------------------|------------|-------------------|-------------------------------------------------------|---------------------------------------------------------|---------------------------------------------------------------|----------------------------------|
| 1             | Pelvis              | 157                | 113        | 303             | 84                     | 117        | 400               | 4                                                     | 3                                                       | 8                                                             | SD                               |
| 2             | Paraortic           | 273                | 229        | 504             | 169                    | 236        | 409               | -2                                                    | 17                                                      | -45                                                           | SD                               |
| 3             | Inguinal            | 248                | 347        | 465             | 87                     | 173        | 140               | 18                                                    | 31                                                      | 84                                                            | CR                               |
|               | Iliac               | 230                | 320        | 395             | 101                    | 177        | 234               | 23                                                    | 17                                                      | 100                                                           |                                  |
| 4             | Pelvis big          | 434                | 379        | 772             | 224                    | 334        | 314               | 1                                                     | 26                                                      | 93                                                            | CR                               |
|               | Pelvis small        | 430                | 372        | 810             | 209                    | 330        | 39                | -10                                                   | 31                                                      | 87                                                            |                                  |
| 5             | Renal               | 354                | 415        | 515             | 244                    | 303        | 58                | 6                                                     | 59                                                      | 84                                                            | CR                               |
|               | L paraaortic        | 314                | 378        | 387             | 242                    | 281        | 34                | 13                                                    | 61                                                      | 90                                                            |                                  |
|               | Central             | 344                | 453        | 449             | 276                    | 305        | 21                | 10                                                    | 43                                                      | 73                                                            |                                  |
|               | Hepatic             | 366                | 445        | 501             | 281                    | 324        | 19                | 8                                                     | 53                                                      | 78                                                            |                                  |
|               | Crux                | 317                | 388        | 420             | 250                    | 286        | 10                | 13                                                    | 39                                                      | 91                                                            |                                  |
| 6             | L iliac             | 387                | 634        | 534             | 248                    | 329        | 34                | 35                                                    | 65                                                      | 100                                                           | CR                               |
|               | Paraortic           | 385                | 600        | 731             | 247                    | 301        | 74                | 49                                                    | 27                                                      | 100                                                           |                                  |
| 7             | R inguinal up       | 221                | 299        | 544             | 49                     | 109        | 16                | 4                                                     | 31                                                      | 83                                                            | PR                               |
|               | R inguinal big      | 261                | 376        | 556             | 95                     | 168        | 71                | 10                                                    | 28                                                      | 42                                                            |                                  |
|               | R inguinal small    | 109                | 140        | 276             | 35                     | 58         | 24                | 16                                                    | 23                                                      | 51                                                            |                                  |
|               | L inguinal up       | 207                | 333        | 427             | 91                     | 130        | 11                | 13                                                    | 13                                                      | 62                                                            |                                  |
|               | L inguinal big      | 260                | 367        | 568             | 69                     | 141        | 114               | 9                                                     | 31                                                      | 65                                                            |                                  |
|               | L inguinal small    | 191                | 281        | 541             | 60                     | 95         | 22                | 29                                                    | 31                                                      | 68                                                            |                                  |
| 8             | R inguinal lateral  | 171                | 281        | 284             | 97                     | 127        | 5                 | 5                                                     | 56                                                      | 84                                                            | CR                               |
|               | R inguinal medial   | 362                | 658        | 486             | 243                    | 317        | 7                 | 14                                                    | 52                                                      | 85                                                            |                                  |
|               | R iliac             | 341                | 543        | 619             | 203                    | 262        | 54                | 15                                                    | 64                                                      | 92                                                            |                                  |
|               | R aorta             | 364                | 566        | 529             | 86                     | 318        | 79                | 23                                                    | 49                                                      | 93                                                            |                                  |
|               | R anterior acetab.  | 371                | 516        | 612             | 172                    | 236        | 34                | 9                                                     | 76                                                      | 97                                                            |                                  |
|               | R posterior acetab. | 380                | 704        | 575             | 225                    | 318        | 44                | 20                                                    | 67                                                      | 93                                                            |                                  |
|               | L acetabulum        | 420                | 658        | 541             | 292                    | 380        | 31                | 29                                                    | 55                                                      | 94                                                            |                                  |
| 9             | R inguinal          | 113                | 174        | 162             | 67                     | 97         | 12                | 10                                                    | 23                                                      | 16                                                            | SD                               |
|               | L inguinal          | 102                | 148        | 167             | 57                     | 75         | 19                | 9                                                     | 18                                                      | 11                                                            |                                  |
|               | L iliac             | 124                | 190        | 233             | 82                     | 99         | 35                | 12                                                    | 17                                                      | 4                                                             |                                  |
| 10            | R anterior iliac    | 413                | 486        | 759             | 203                    | 303        | 45                | 9                                                     | 43                                                      | 64                                                            | CR                               |
|               | R posterior iliac   | 403                | 492        | 574             | 218                    | 334        | 54                | 17                                                    | 40                                                      | 89                                                            |                                  |
|               | R inguinal          | 358                | 391        | 926             | 116                    | 216        | 76                | 4                                                     | 29                                                      | 79                                                            |                                  |
| 11            | L kidney up         | 575                | 517        | 959             | 373                    | 466        | 7                 | 36                                                    | 25                                                      | -7                                                            | SD                               |
|               | L kidney down       | 565                | 485        | 1046            | 278                    | 387        | 15                | 8                                                     | 17                                                      | 21                                                            |                                  |
|               | R psoas             | 566                | 482        | 1367            | 231                    | 395        | 113               | 1                                                     | 2                                                       | -33                                                           |                                  |
| 12            | Para vertebral      | 245                | 318        | 388             | 167                    | 202        | 28                | 1                                                     | 24                                                      | 91                                                            | CR                               |
| 13            | Hilar spleen        | 391                | 541        | 424             | 334                    | 379        | 7                 | 10                                                    | 56                                                      | 63                                                            | CR                               |
|               | L Dph               | 300                | 373        | 414             | 229                    | 269        | 36                | 25                                                    | 48                                                      | 68                                                            |                                  |
|               | L paraaortic        | 306                | 392        | 430             | 203                    | 261        | 84                | 9                                                     | 38                                                      | 84                                                            |                                  |
|               | L psoas             | 249                | 312        | 484             | 127                    | 191        | 36                | 11                                                    | 34                                                      | 85                                                            |                                  |
|               | R Dph down          | 303                | 386        | 399             | 234                    | 265        | 6                 | 10                                                    | 17                                                      | 82                                                            |                                  |
|               | R Dph up            | 296                | 371        | 434             | 231                    | 266        | 27                | 22                                                    | 40                                                      | 55                                                            |                                  |
|               | R paraaortic        | 326                | 403        | 449             | 213                    | 282        | 97                | 25                                                    | 20                                                      | 61                                                            |                                  |
| 14            | L neck up           | 215                | 173        | 278             | 153                    | 190        | 3                 | 1                                                     | 21                                                      | 100                                                           | CR                               |
|               | L neck mid          | 294                | 251        | 371             | 230                    | 267        | 2                 | -4                                                    | 9                                                       | 100                                                           |                                  |
|               | L neck down         | 352                | 309        | 419             | 250                    | 323        | 2                 | -6                                                    | 55                                                      | 100                                                           |                                  |
| 15            | Central             | 455                | 409        | 564             | 334                    | 394        | 18                | 17                                                    | 17                                                      | 51                                                            | PR                               |
| 16            | Abdominal           | 196                | 152        | 320             | 118                    | 168        | 423               | 13                                                    | 19                                                      | 41                                                            | SD                               |
| 17            | Spleen              | NA                 | NA         | NA              | NA                     | NA         | 157               | 2                                                     | 17                                                      | 18                                                            | SD                               |
|               | L pelvis            | NA                 | NA         | NA              | NA                     | NA         | 135               | 20                                                    | 21                                                      | 33                                                            |                                  |
|               | L Ex                | NA                 | NA         | NA              | NA                     | NA         | 19                | 28                                                    | 18                                                      | 7                                                             |                                  |
| 18            | Lung                | 239                | 318        | 407             | 159                    | 198        | 151               | 39                                                    | 56                                                      | 69                                                            | PR                               |
| 19            | L neck              | 408                | 611        | 680             | 198                    | 276        | 12                | 15                                                    | 30                                                      | 72                                                            | CR                               |
| 20            | L iliac             | 341                | 498        | 508             | 226                    | 287        | 7                 | 18                                                    | 30                                                      | 64                                                            | PR                               |
|               | L inguinal inferior | 377                | 506        | 657             | 166                    | 272        | 45                | 15                                                    | 31                                                      | 71                                                            |                                  |
|               | R iliac             | 711                | 764        | 1372            | 183                    | 463        | 12                | 2                                                     | 31                                                      | 74                                                            |                                  |
|               | R inguinal inferior | 553                | 692        | 1404            | 201                    | 373        | 34                | 10                                                    | 27                                                      | 61                                                            |                                  |
|               | R inguinal lateral  | 364                | 437        | 584             | 115                    | 217        | 5                 | 13                                                    | 17                                                      | 68                                                            |                                  |
|               | R inguinal medial   | 531                | 743        | 900             | 251                    | 381        | 14                | 21                                                    | 42                                                      | 70                                                            |                                  |
|               | R inguinal superior | 295                | 391        | 590             | 137                    | 192        | 5                 | 32                                                    | 28                                                      | 71                                                            |                                  |
| <b>Median</b> |                     | <b>341</b>         | <b>391</b> | <b>508</b>      | <b>203</b>             | <b>269</b> | <b>34</b>         | <b>12</b>                                             | <b>30</b>                                               | <b>72</b>                                                     |                                  |

\* % decrease in tumor volume defined on first and last post-tracer SPECT/CT (a time period of 6 days)  
 \*\* % decrease in tumor volume defined on first and last post-therapy SPECT/CT (a time period of approximately 6 days)  
 \*\*\* % decrease in product of largest perpendicular diameters at 2 months compared with first post-tracer time point  
 \*\*\*\*all lesions evaluated by Cheson criteria, which includes PET findings [19]

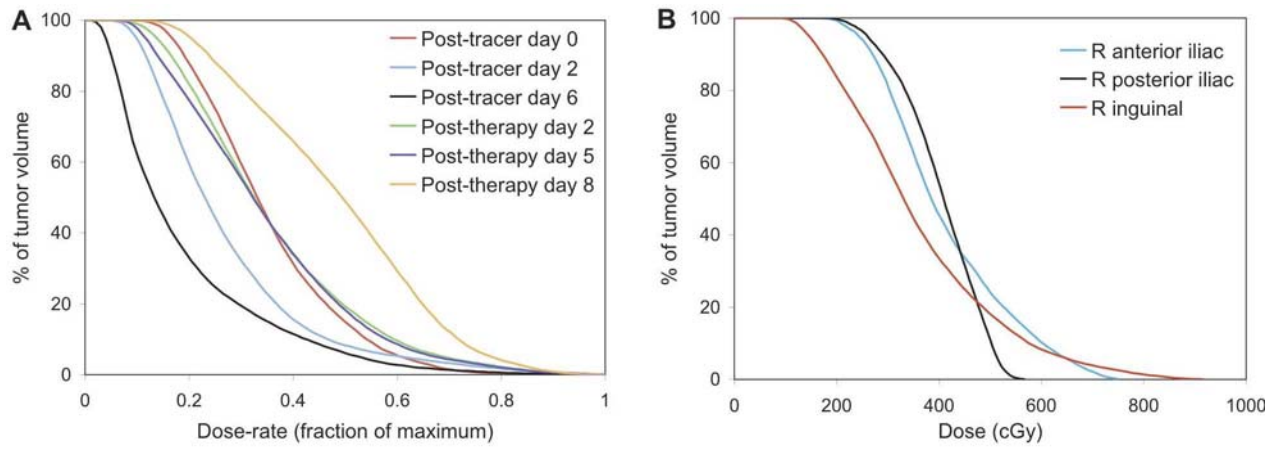

FIGURE 1. (A) Dose-rate volume histograms for the inguinal tumor of patient #10 at the six imaging time points. (B) Dose-volume histograms for this tumor and two other tumors of the same patient.
